# Supplementary material
Source: PubMed Central journal article supplement (PMC2426729)

# Supplementary Figure 1

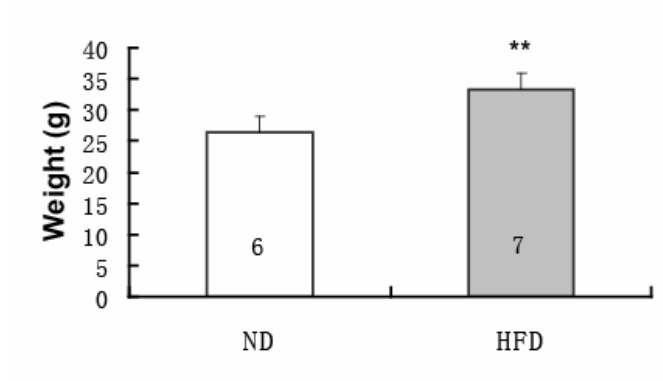

# Supplementary Figure 2

A

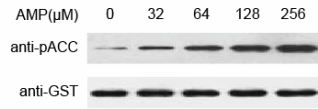

B

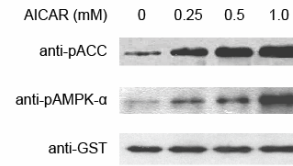

C

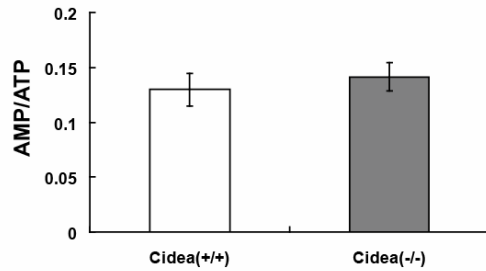

D

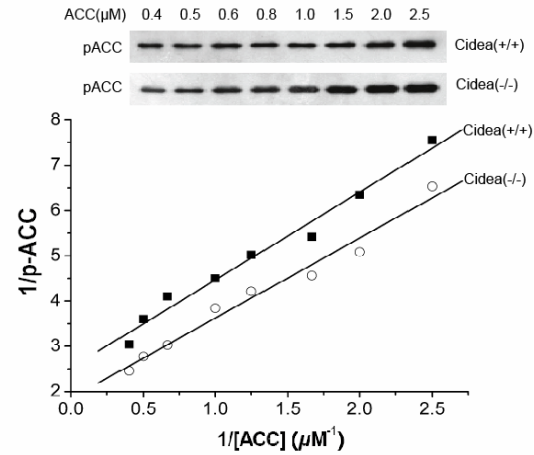

E

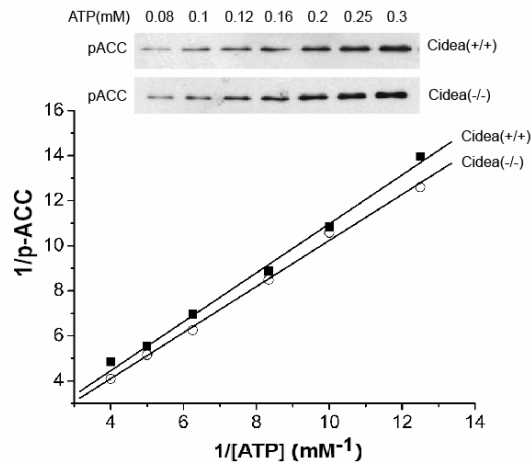

F

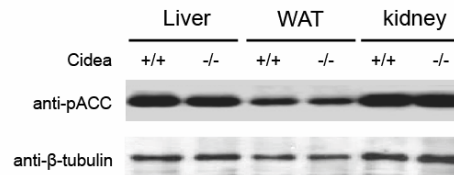

# Supplementary Figure 3

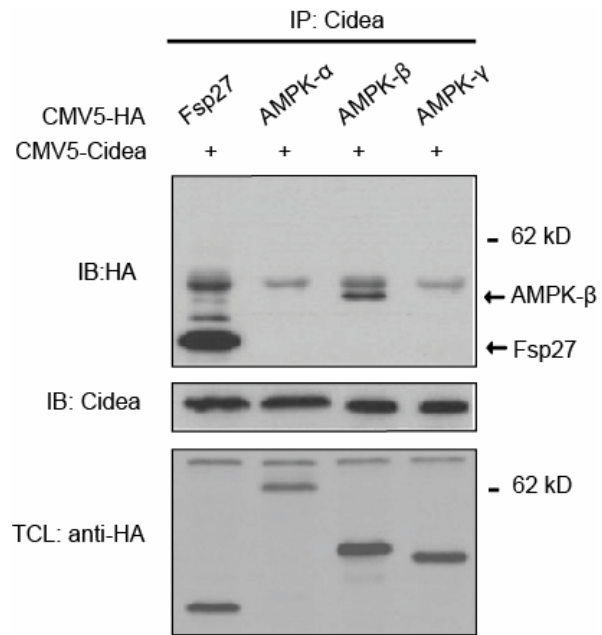

# Supplementary Figure 4

A

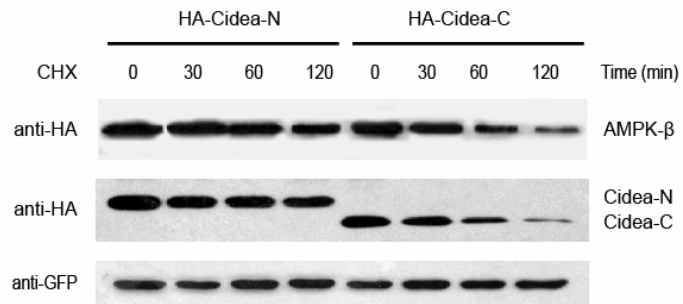

B

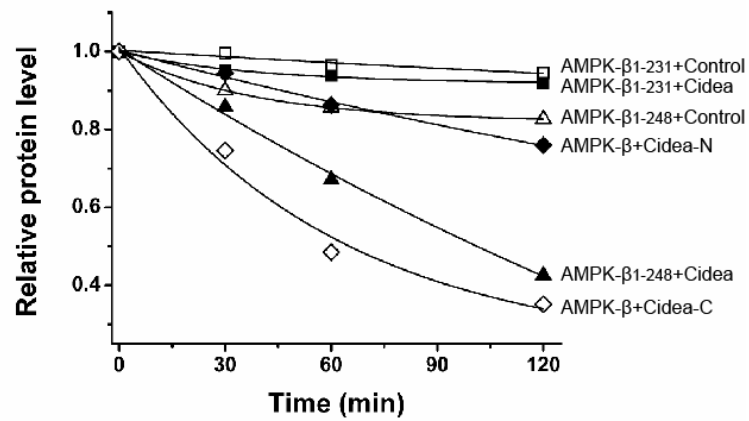

# Supplementary Figure 5

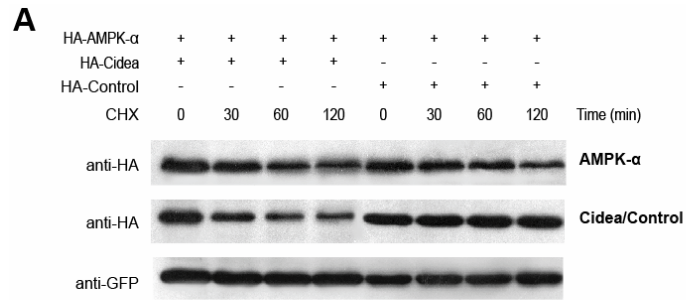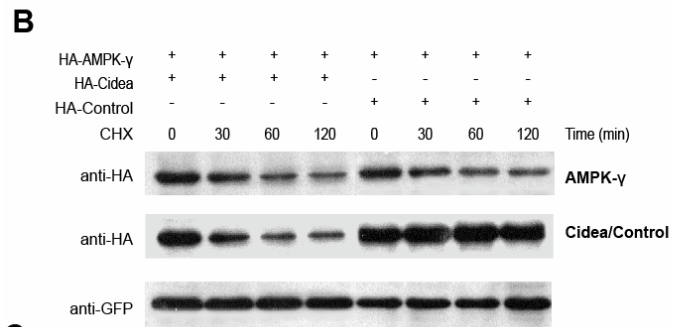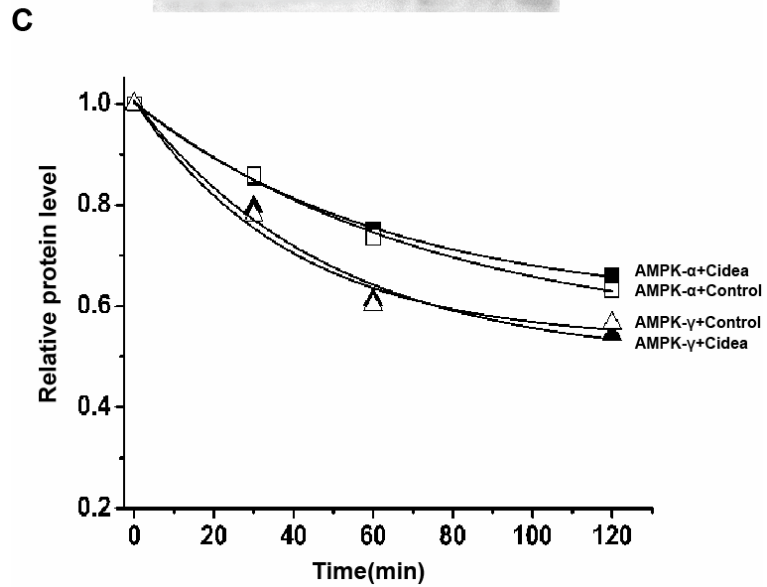

# Supplementary Figure 6

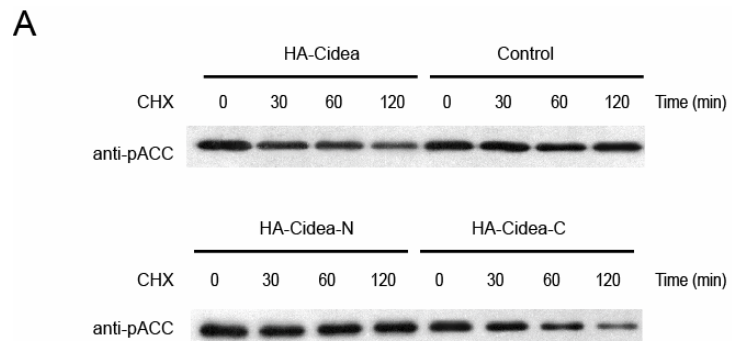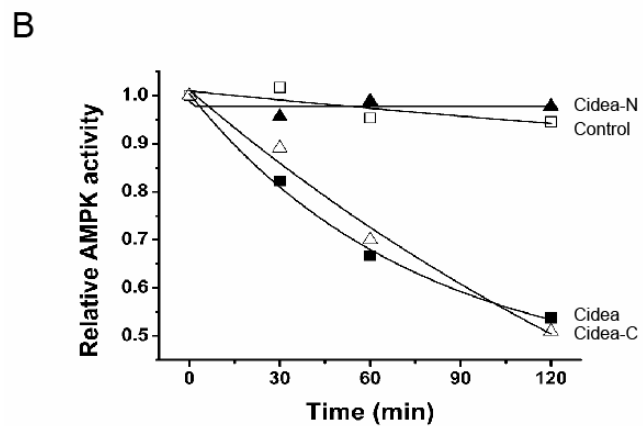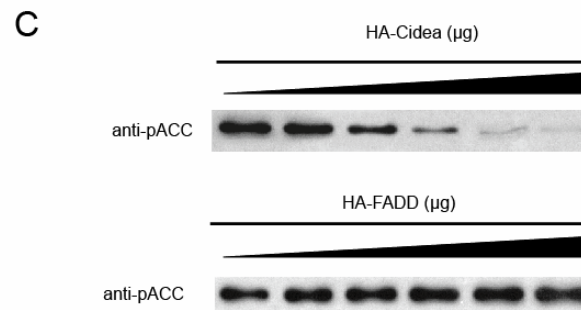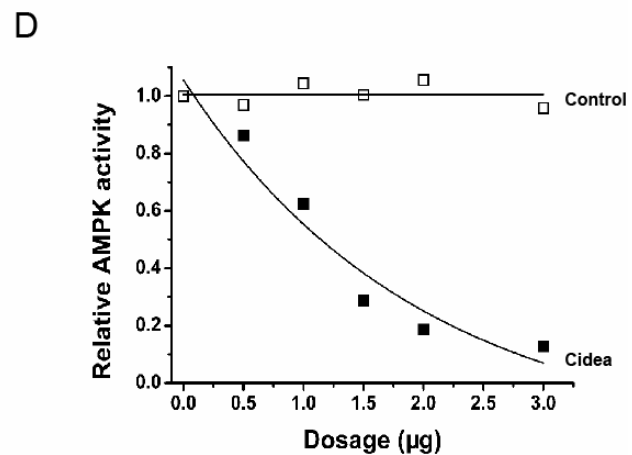

# Supplementary Figure 7

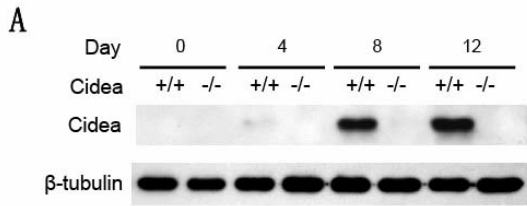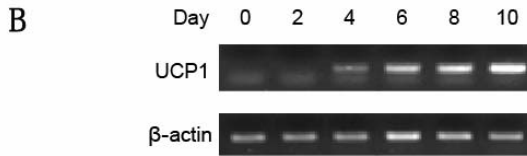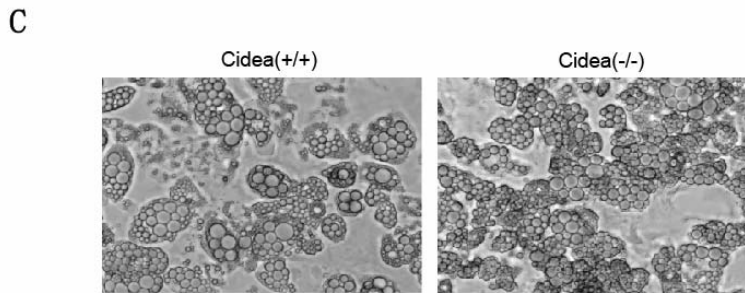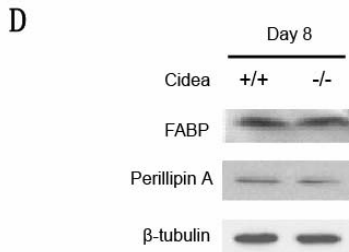

# Supplementary Figure 8

A

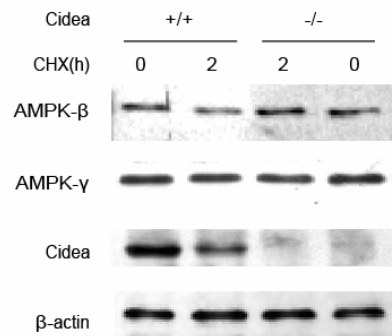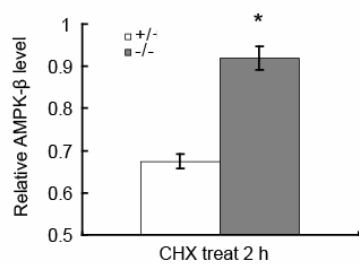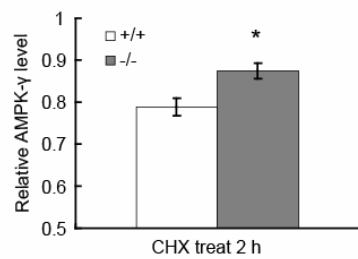

B

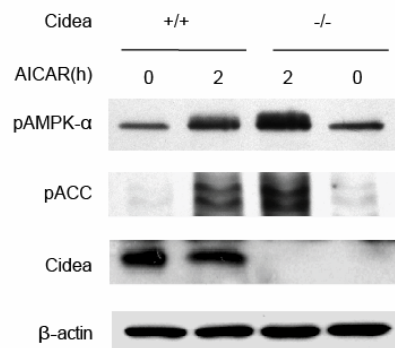



# Supplementary Figure 9

A

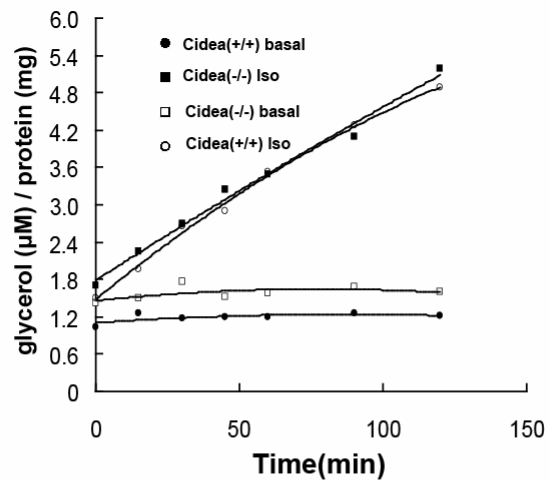

B

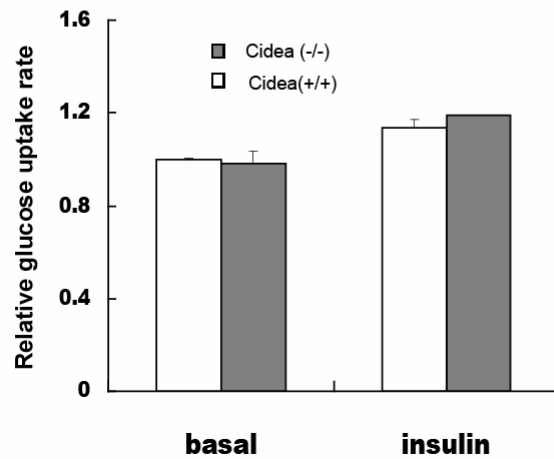

## Supplementary Figure 10

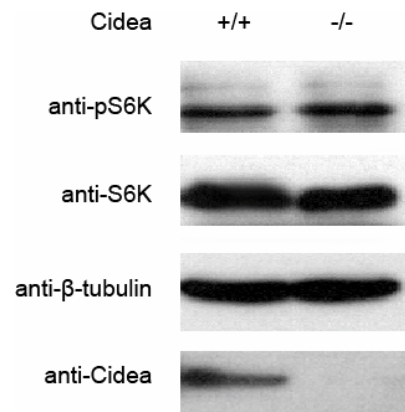

Supplement: emboj200892s1.pdf [file emboj200892s1.pdf]
